# Supplementary material for: Adenovirus expressing nc886, an anti-interferon and anti-apoptotic non-coding RNA, is an improved gene delivery vector
Source: PubMed Central journal article supplement — Mol Ther Nucleic Acids. 2024 Jul 16;35(3):102270. doi: 10.1016/j.omtn.2024.102270 (PMC11338102; doi:10.1016/j.omtn.2024.102270), 2024-07-16
Supplement: mmc1.pdf [file mmc1.pdf]

## **Supplemental information**

### **Adenovirus expressing nc886, an anti-interferon and anti-apoptotic non-coding RNA, is an improved gene delivery vector**

**Enkhjin Saruuldalai, Hwi-Ho Lee, Yeon-Su Lee, Eun Kyung Hong, Soyoun Ro, Yeochan Kim, TaeJin Ahn, Jong-Lyul Park, Seon-Young Kim, Seung-Phil Shin, Wonkyun Ronny Im, Eunjung Cho, Beom K. Choi, Jiyoung Joan Jang, Byung-Han Choi, Yuh-Seog Jung, In-Hoo Kim, Sang-Jin Lee, and Yong Sun Lee**



## List of Supplemental Tables

**Table S1.** Expression (TPM values from RNA-seq) of 376 ISGs at 6 hpi.

**Table S2.** Expression (TPM values from RNA-seq) of 376 ISGs at 24 hpi.

**Table S3.** Biocarta pathways: Z-scores relative to column B ("uninfected") samples

**Table S4.** Reactome pathways: Z-scores relative to column B ("uninfected") samples

**Table S5.** Gene Ontology Biological Process pathways: Z-scores relative to column C ("uninfected") samples

**Table S6.** Primers and probes used in this study

| <b>primer name</b> | <b>sequence (5' to 3')</b> | <b>comments</b>                                     |
|--------------------|----------------------------|-----------------------------------------------------|
| Hexon_2636-56      | TTATGTCCATGGGCGCACTCA      | forward primer for AdV Hexon qRT-PCR, qPCR          |
| Hexon_2783-60      | ACACGGACCACGTCAAAGACTTCA   | reverse primer for AdV Hexon qRT-PCR, qPCR          |
| Ad_VAI_142-22      | TTGTCTGACGTCGCACACCTG      | Northern probe for adenoviral ncRNA VA I            |
| miR-886-3p as      | AAGGGTCAGTAAGCACCCGCG      | Northern probe and reverse primer for nc886 qRT-PCR |
| miR-886-5p sense   | CGGGTCGGAGTTAGCTCAAGCGG    | forward primer for nc886 qRT-PCR                    |
| Gapdh_774-96       | CATCACTGCCACCCAGAAGACTG    | forward primer for mouse Gapdh qRT-PCR              |
| Gapdh_926-04       | ATGCCAGTGAGCTTCCCCTTCAG    | reverse primer for mouse Gapdh qRT-PCR              |
| mIfit1-885-905     | TTCTAAACAGGGCCTTGCAAG      | forward primer for mouse Ifit1 qRT-PCR              |
| mIfit1-1019-999    | CTTGACATTGTCTGCCTTC        | reverse primer for mouse Ifit1 qRT-PCR              |
| mIfit2_658-78      | AGCACTGCAGAGGTCTAAATG      | forward primer for mouse Ifit2 qRT-PCR              |
| mIfit2_788-68      | GTAGACCCAAGCATAGTTTCC      | reverse primer for mouse Ifit2 qRT-PCR              |
| mXaf1_1484-504     | CGCACACACACATGCTAACAT      | forward primer for mouse Xaf1 qRT-PCR               |
| mXaf1_1618-598     | CTGGGTGGGGTACTATCAGAT      | reverse primer for mouse Xaf1 qRT-PCR               |
| IFIT1_3739-62      | CCCCAAGAAAATCTCCAAATTTTG   | forward primer for human IFIT1 qRT-PCR              |
| IFIT1_3859-36      | AATCTCTGTCCTACCTTCTTAAGG   | reverse primer for human IFIT1 qRT-PCR              |
| XAF1_897-920       | GTTAGCTTCATCAAAAGGAAAACA   | forward primer for human XAF1 qRT-PCR               |
| XAF1_997-74        | GAATGCCAGTGTTAAAAGTGAAAT   | reverse primer for human XAF1 qRT-PCR               |
| 18S rRNA 281-300   | CGGCTTTGGTGACTCTAGAT       | forward primer for human 18S rRNA qRT-PCR           |
| 18S rRNA 381-362   | GCGACTACCATCGAAAGTTG       | reverse primer for human 18S rRNA qRT-PCR           |
